# TAKING ISSUE

## Can We Bridge the Knowing-Doing Gap?

A search for the term “evidence-based” yields almost 1,700 citations in *Psychiatric Services* over the past ten years. Each issue contains numerous studies, sometimes highly focused, sometimes covering broad issues or large populations, each purporting to provide new evidence to expand our knowledge and augment our clinical practice. Many carefully enumerate the limitations of their findings. Most call for further research.

Alas, I fear that we are more involved and invested in collecting evidence than in using what we find.

As professor and teacher, I work to ensure that residents and medical students understand scientific methodology and research-based approaches to clinical decision making. As psychiatrist-in-chief of a large university hospital, I receive countless memos stressing evidence-based decision making. As a reviewer for a number of journals, I focus on assessing the quality of data collected, the methodology employed, and the analyses conducted. As a researcher, I struggle to ask the right questions and provide discussion of why the answers are important and useful.

Sometimes I wonder why I bother.

I'd like to believe that practitioners are aware of the results of clinical trials, read articles comparing interventions, and make decisions reflecting their assessment of these findings. The sad truth is I rarely find evidence to support this belief. Ask 100 psychiatrists if a single antipsychotic medication is superior to all others in its efficacy in the treatment of schizophrenia, and they will all know the answer. “It's clozapine.” Ask 100 clinic directors how many patients in their services are treated with clozapine and how many should be, and the apologies and explanations begin. Ask colleagues if they read any psychopharmacology trials. Although many know the literature, the N=1 study (“I tried my patient on that medication and he did really, really well, so that's what I use”) seems far too common.

Ask a group of residents what the greatest cause of treatment failure is, and all respond “nonadherence.” Yet most state that they received less than one hour (the mode is zero) of formal training on improving adherence. Question colleagues about the helpfulness of case management, the provision of housing for homeless clients, or the need for longer, more frequent contact with their patients. Everyone knows the evidence supporting these approaches. Most of us know what to do. We just don't do it.

What stands between what we know and what we do? Is it an underlying skepticism about research findings? Burnout? Laziness? Payment issues? Understanding our failure to translate evidence into practice is one of the burning issues in our field. How can we bridge the knowing-doing gap? Now that's translational research I'd like to see done!—STEPHEN MARK GOLDFINGER, M.D., *Department of Psychiatry and Behavioral Sciences, SUNY Downstate Medical Center, Brooklyn*

*Psychiatric Services*, established in 1950, is published monthly by the American Psychiatric Association for mental health professionals and others concerned with treatment and services for persons with mental illnesses and mental disabilities, in keeping with APA's objectives to improve care and treatment, to promote research and professional education in psychiatric and related fields, and to advance the standards of all psychiatric services and facilities.

### Editor

Howard H. Goldman, M.D., Ph.D.

### Editorial Board

David A. Adler, M.D.  
Javier I. Escobar, M.D.  
Stephen M. Goldfinger, M.D.  
Richard K. Harding, M.D.  
Roberto Lewis-Fernández, M.D.  
Grayson S. Norquist, M.D., M.S.P.H.  
Martha Sajatovic, M.D.  
Gregory E. Simon, M.D., M.P.H.  
Bradley D. Stein, M.D., Ph.D.  
Marvin S. Swartz, M.D.  
Marcia Valenstein, M.D.  
Bonnie T. Zima, M.D., M.P.H.

### Editor Emeritus

John A. Talbott, M.D.

### Book Review Editor

Jeffrey L. Geller, M.D., M.P.H.

### Contributing Editors

Paul S. Appelbaum, M.D., *Law & Psychiatry*

José Miguel Caldas de Almeida, M.D.,  
and Marcela Horvitz-Lennon, M.D.,  
M.P.H., *Mental Health Care Reforms  
in Latin America*

Francine Cournois, M.D., and Stephen  
M. Goldfinger, M.D., *Frontline  
Reports*

Lisa B. Dixon, M.D., M.P.H., and Brian  
Hepburn, M.D., *Public-Academic  
Partnerships*

Jeffrey L. Geller, M.D., M.P.H., *Personal  
Accounts*

William M. Glazer, M.D., *Best Practices*  
Amy M. Kilbourne, Ph.D., M.P.H., and  
Tami L. Mark, Ph.D., *Datapoints*

Matt Muijen, M.D., Ph.D., *Mental  
Health Care Reforms in Europe*  
Fred C. Osher, M.D., *State Mental  
Health Policy*

Jules M. Ranz, M.D., and Susan M.  
Deakins, M.D., *Case Studies in Public-  
Sector Leadership*

Steven S. Sharfstein, M.D., Haiden A.  
Huskamp, Ph.D., and Alison Evans  
Cuellar, Ph.D., *Economic Grand  
Rounds*

### Statistical Consultant

Deborah R. Medoff, Ph.D.

### Editorial Consultants

Joseph M. Cerimele, M.D.  
Julie M. Donohue, Ph.D.  
Robert E. Drake, M.D., Ph.D.  
M. Susan Ridgely, J.D.  
Laura Van Tosh

### Editorial Staff

Constance Grant Gartner, *Managing  
Editor*

Demarie S. Jackson, *Associate Editor*

Kathleen Stearman, *Associate Editor*

Wendy Lieberman Taylor, *Production  
Manager*

Y. Nicole Gray, *Editorial Support  
Services Manager*

### Publisher

Rebecca D. Rinehart

### American Psychiatric Association

Dilip V. Jeste, M.D., *President*

Jeffrey A. Lieberman, M.D., *President-Elect*

Roger Peele, M.D., *Secretary*

David Fassler, M.D., *Treasurer*

R. Scott Benson, M.D., *Speaker, APA  
Assembly*

James H. Scully, M.D., *Medical Director  
and CEO*
