*Psychiatric Services* is a monthly interdisciplinary journal published by the American Psychiatric Association.

**Editor**

Howard H. Goldman, M.D., Ph.D.

**Managing Editor**

Constance Grant Gartner, M.S.W.

**Mailing Address**

*Psychiatric Services*  
American Psychiatric Association  
1000 Wilson Boulevard  
Suite 1825  
Arlington, VA 22209-3901

**Editorial Office**

Phone: 703-907-7885  
Fax: 703-907-1095  
E-mail: psjournal@psych.org

**Production Manager**

Wendy Lieberman Taylor

**Advertising Sales****Print and Online Advertising**

Valentin Torres  
Pharmaceutical Media, Inc.  
Phone: 212-685-5010  
E-mail: vtorres@pminy.com

**Subscriptions and  
Customer Service**

Phone: 800-368-5777,  
703-907-7322  
Fax: 703-907-1091  
E-mail: appi@psych.org

**Sales and Marketing**

Christie Couture  
Phone: 703-907-7877  
Fax: 703-907-1092  
E-mail: ccouture@psych.org

**Print Subscriptions**

For U.S. members of the American Psychiatric Association, a one-year subscription (12 issues) is \$98. For international members, the one-year rate is \$177. For nonmembers, a one-year subscription within the United States is \$131 for individuals and a subscription outside the United States is \$196 for individuals.

Institutional subscriptions are tier priced. For institutional site license information and pricing, contact us at [institutions@psych.org](mailto:institutions@psych.org) or 800-368-5777.

Individual subscriptions can be ordered online by visiting the American Psychiatric Publishing Web site at [www.appi.org](http://www.appi.org). To order by telephone, call Customer Service at 800-368-5777 or 703-907-7322. Mail subscription orders to Customer Service at the address shown on the left. Make checks payable to the American Psychiatric Association.

All subscriptions to the print journal include access to the online journal on the internet. To access the content online, please use your APP or APA username and password. Go to [www.psychiatryonline.org](http://www.psychiatryonline.org) to retrieve them.

Individual subscribers also have free full-text access to the journal's Legacy Collection (1950–1996).

**Online-Only Subscriptions**

APA members, including international members, can purchase an online-only subscription for \$54 per year. For other individuals the cost is \$118 per year (\$37 for students).

**Address Changes and  
Subscription Inquiries**

For address changes or inquiries about subscription status or billing, contact Customer Service. For faster service, refer to the personal I.D. number located above the name on

the mailing label. For address changes, include both the old and the new address. Please give at least six weeks' notice of a change of address to ensure uninterrupted service. For address changes or inquiries about group subscriptions, phone 800-368-5777.

Please notify Customer Service of missed issues within two months and allow two to three weeks for delivery.

**Single Issues**

Single issues from previous volumes or earlier issues in the current volume are available for purchase from Customer Service. Single issues are \$42 in the U.S. and \$58 outside the U.S.

**Permissions and Reprints**

Material published in the journals of the American Psychiatric Association and American Psychiatric Publishing (APP) is protected by copyright and all rights are reserved. Material may not be reproduced in any form or by any means without written permission from the copyright owner. For permission to reproduce material from American Psychiatric Association and APP journals, please visit [www.appi.org/customerservice/pages/Permissions.aspx](http://www.appi.org/customerservice/pages/Permissions.aspx) for more information. Permission can also be secured through the Copyright Clearance Center ([www.copyright.com](http://www.copyright.com)). For bulk reprints, please contact Cecilia Stoute at 703-907-8547; e-mail: [cstoute@psych.org](mailto:cstoute@psych.org).

**Advertising**

For advertising rates and other information, contact one of the advertising sales representatives listed in the column at left.

All ads are subject to editorial approval before publication. APA accepts no responsibility for claims made by advertisers. The acceptance of advertising does not in any way constitute APA endorsement or approval of any advertised service or product.
