December 2012

# PSYCHIATRIC SERVICES

A Journal of the  
American Psychiatric  
Association

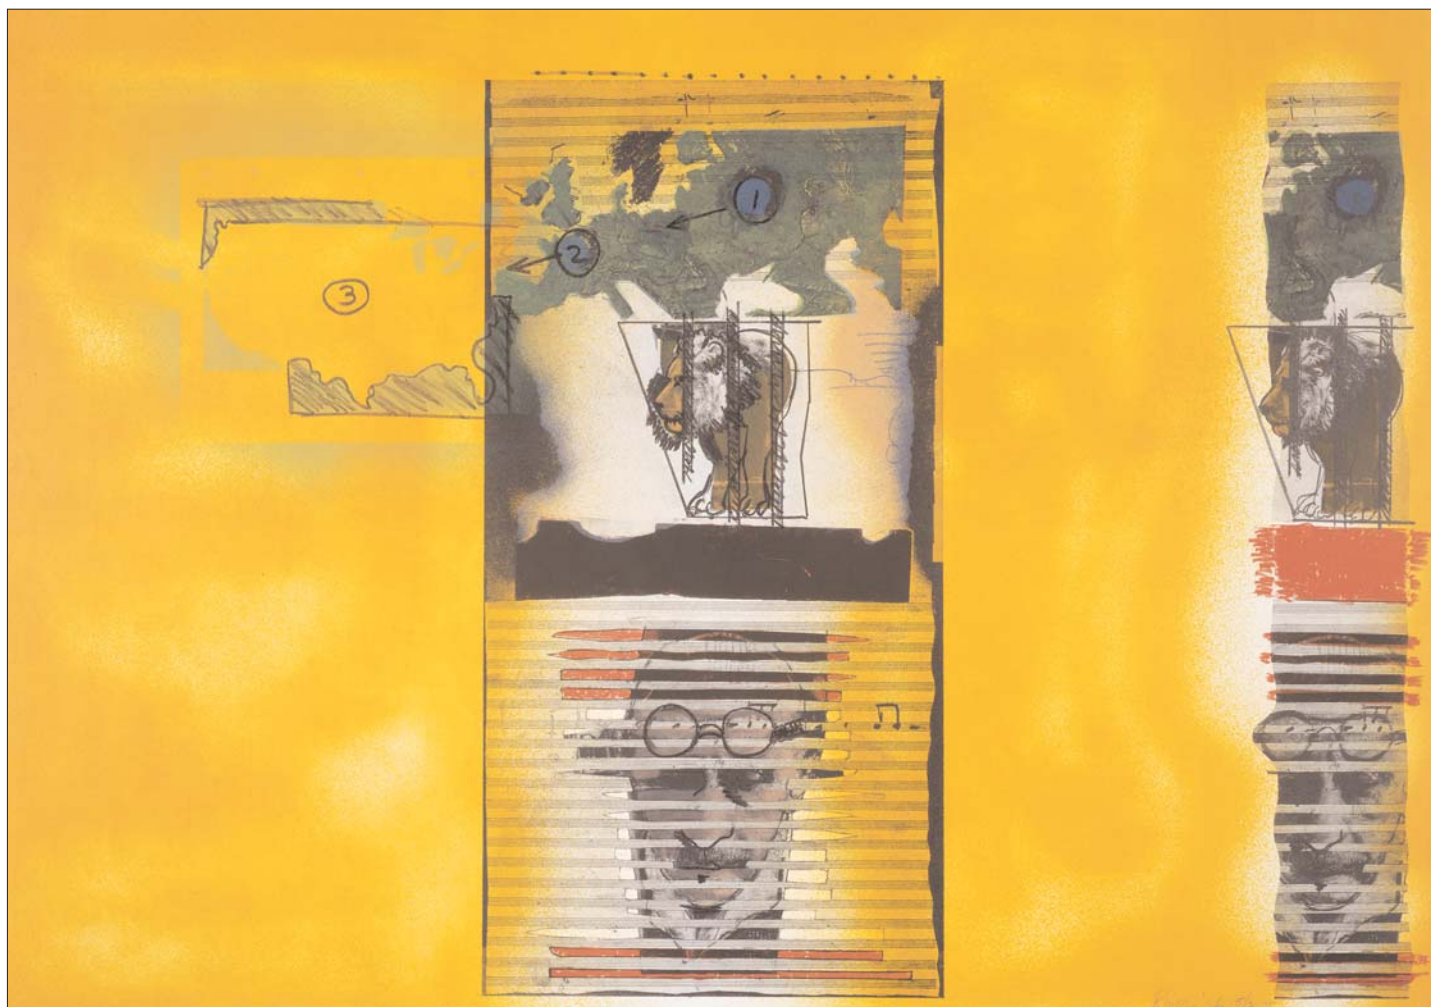

◆ Intensive Peer Support and Case Management for Homeless Veterans

◆ Diffusion and Adoption of Mental Health Treatments: Two Recent Investigations

◆ Health Care Reform: A Golden Opportunity for Preventive Psychiatry
